# Supplementary material
Source: MDPI journal article supplement (https://www.mdpi.com/2073-4441/16/7/919)
Supplement: s1 [file s1]

### Supplementary Data

**Table S1.** Basic statistical characteristic values of annual runoff series

| River   | Length of runoff series | Mean value/mm | Mean square deviation | Coefficient of variation | Coefficient of skewness |
|---------|-------------------------|---------------|-----------------------|--------------------------|-------------------------|
| Dayekou | 30                      | 178.65        | 0.974                 | 0.221                    | 1.773                   |

**Table S2.** Basic statistical characteristic values of runoff series

| Parameter value          | $\bar{R}$ | $\delta$ | $C_v$ |
|--------------------------|-----------|----------|-------|
| Annual river runoff/ mm  | 178.65    | 46.38    | 0.32  |
| Annual precipitation/ mm | 386.74    | 46.55    | 0.22  |
| Annual average           | 1.73      | 0.35     | 0.17  |

**Table S3.** Interannual regression statistics of temperature, precipitation and river runoff at Dayekou Basin

|                                    |       |                |        |
|------------------------------------|-------|----------------|--------|
| Coefficient of multiple            | 0.844 | Standard error | 17.218 |
| Coefficient of determination $R^2$ | 0.701 | Observed value | 25     |
| Regulation factor $R^2$            | 0.715 |                |        |

**Table S4.** Interannual regression statistics of temperature and precipitation and river runoff at Dayekou Basin

|                     | df | SS       | MS      | F     | Significance F |
|---------------------|----|----------|---------|-------|----------------|
| Regression analysis | 2  | 17233.02 | 9118.01 | 21.32 | 0.00008574     |
| Residual error      | 15 | 9331.50  | 319.17  |       |                |
| Grand total         | 17 | 26564.52 |         |       |                |

**Table S5.** Interannual regression statistics of temperature and precipitation and river runoff at Dayekou Basin

|                        | Coefficients | Standard error | t Stat | P-value | Lower 95% | Upper 95% | Lower limit | Upper limit 95.0% |
|------------------------|--------------|----------------|--------|---------|-----------|-----------|-------------|-------------------|
| Intercept              | -28.52       | 33.83          | -0.71  | 0.46    | -98.08    | 41.04     | -98.08      | 41.04             |
| Annual average         | 27.02        | 12.57          | 3.47   | 0.06    | 2.78      | 51.26     | 2.78        | 51.26             |
| Annual precipitation/m | 0.61         | 0.13           | 5.41   | 0       | 0.44      | 0.78      | 0.44        | 0.78              |

**Table S6.** Measured and predicted temperature, precipitation and river runoff at Dayekou Basin

| Month               |   | 1      | 2     | 3     | 4     | 5     | 6     | 7     | 8     | 9     | 10    | 11    | 12     |
|---------------------|---|--------|-------|-------|-------|-------|-------|-------|-------|-------|-------|-------|--------|
| Air temperature/ °C | m | -16.07 | -7.37 | -0.26 | 5.28  | 8.94  | 11.14 | 11.64 | 10.44 | 7.64  | 3.24  | -2.86 | -10.56 |
|                     | a | -11.77 | -8.89 | -4.26 | 2.82  | 8.01  | 12.51 | 14.51 | 13.01 | 8.31  | 1.61  | -4.89 | -9.99  |
| Precipitation /mm   | m | 8.23   | -3.9  | 6.24  | 27.16 | 48.43 | 64.33 | 70.63 | 65.73 | 50.83 | 29.93 | 9.33  | -1.77  |
|                     | a | 2.83   | 4.73  | 11.54 | 20.26 | 43.83 | 53.83 | 82.53 | 65.63 | 64.03 | 17.63 | 4.93  | 2.93   |
| Runoff volume /mm   | m | 2.23   | -4.57 | 0.34  | 10.98 | 21.94 | 30.14 | 33.54 | 31.24 | 24.04 | 14.04 | 4.74  | 1.04   |
|                     | a | 0      | 0     | 0.84  | 5.54  | 22.92 | 29.92 | 37.72 | 29.12 | 25.32 | 11.32 | 5.62  | 0.92   |

**“m” refers to the measured values and “a” refers to the predicted values**

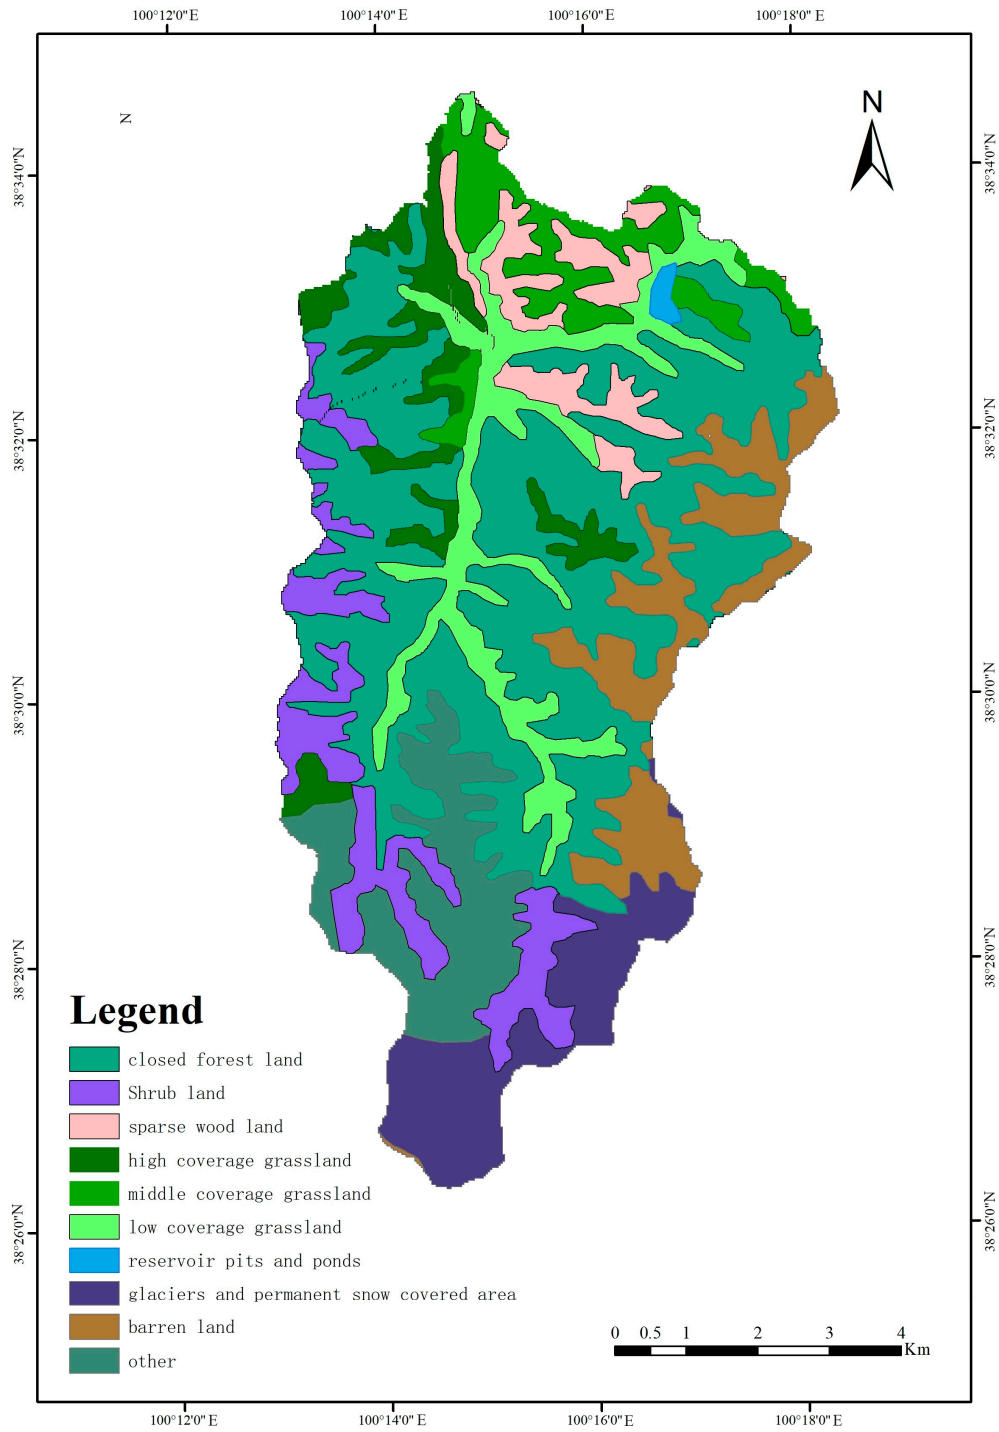

**Figure S1: Map of the study area showing the landcover.**
